# Supplementary material for: Axl, Immune Checkpoint Molecules and HIF Inhibitors from the Culture Broth of Lepista luscina
Source: MDPI journal article supplement (doi:10.3390/molecules27248925), 2022-12-15
Supplement: s1 [file s1]

Supplementary Data

## Axl, Immune Checkpoint and HIF Inhibitors from Culture Broth of *Lepista luscina*

Mihaya Kotajima <sup>1,†</sup>, Jae-Hoon Choi <sup>1,2,3,4,†</sup>, Mitsuru Kondo <sup>1,2</sup>, Corina N. D'Alessandro-Gabazza <sup>5</sup>, Masaaki Toda <sup>5</sup>, Taro Yasuma <sup>5</sup>, Esteban C. Gabazza <sup>5</sup>, Yukihiro Miwa <sup>6</sup>, Chiho Shoda <sup>6</sup>, Deokho Lee <sup>6</sup>, Ayaka Nakai <sup>6</sup>, Toshihide Ku-rihara <sup>6</sup>, Jing Wu <sup>3,4</sup>, Hirofumi Hirai <sup>1,2,3,4</sup> and Hirokazu Kawagishi <sup>3,4,\*</sup>

<sup>1</sup> Graduate School of Science and Technology, Shizuoka University, 836 Ohya, Suruga-ku, Shizuoka 422-8529, Japan

<sup>2</sup> Research Institute of Green Science and Technology, Shizuoka University, 836 Ohya, Suruga-ku, Shizuoka 422-8529, Japan

<sup>3</sup> Faculty of Agriculture, Shizuoka University, 836 Ohya, Suruga-ku, Shizuoka 422-8529, Japan

<sup>4</sup> Research Institute for Mushroom Science, Shizuoka University, 836 Ohya, Suruga-ku, Shizuoka 422-8529, Japan

<sup>5</sup> Department of Immunology, Mie University Graduate School of Medicine, Edobashi 2-174, Mie 524-8507, Japan

<sup>6</sup> Department of Ophthalmology, Keio University School of Medicine, 35 Shina-nomachi, Shinjuku-ku, Tokyo 160-8582, Japan

\* Correspondence: kawagishi.hirokazu@shizuoka.ac.jp

† These authors contributed equally to this work.

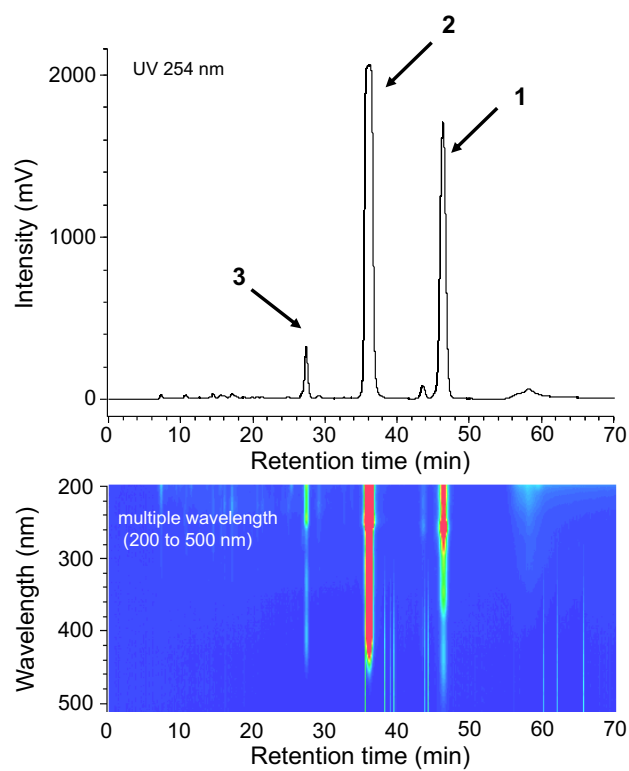

Figure S1. HPLC profile of metabolites from hexane soluble part of liquid culture of *L. luscina*.

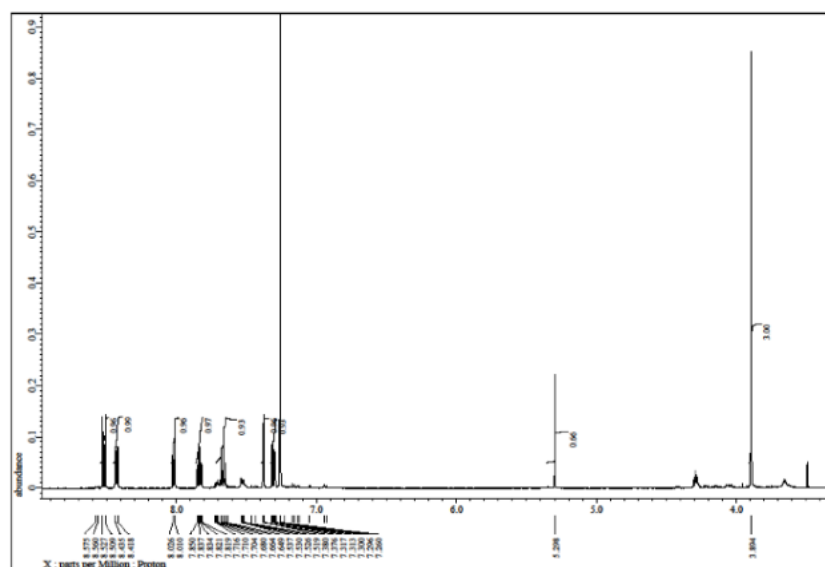

Figure S2.  $^1\text{H}$  NMR spectrum of **1** ( $\text{CDCl}_3$ ).

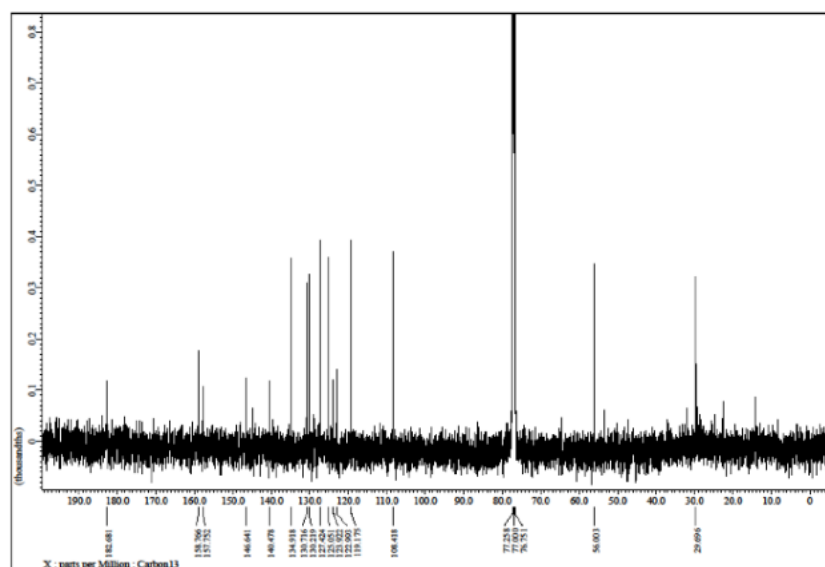

Figure S3. <sup>13</sup>C NMR spectrum of **1** (CDCl<sub>3</sub>).

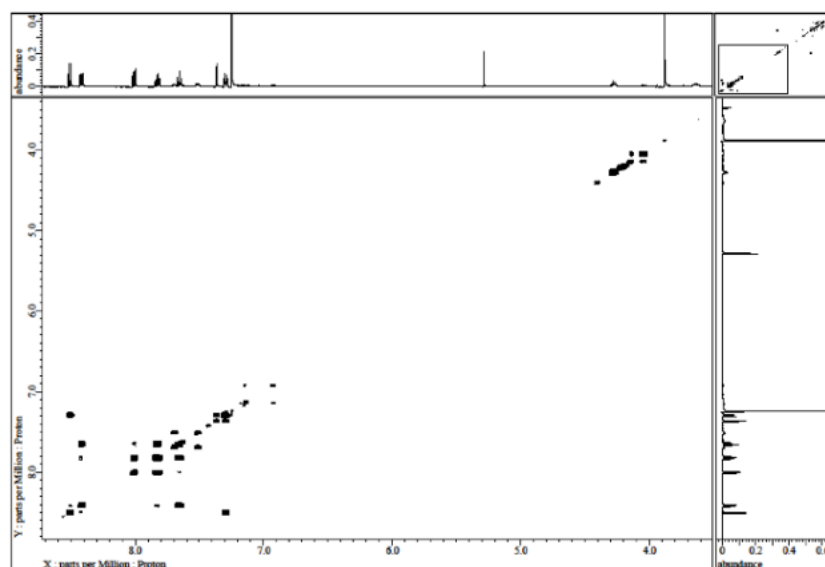

Figure S4. COSY spectrum of **1** (CDCl<sub>3</sub>).

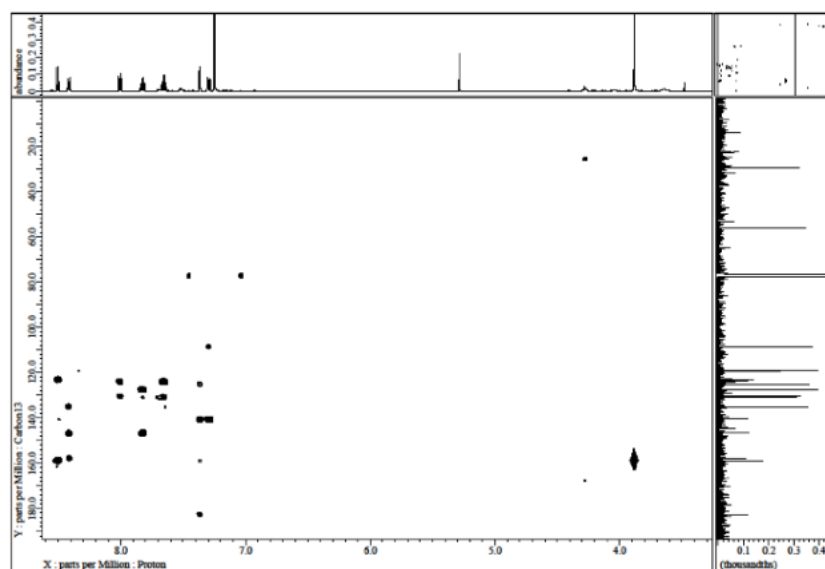

Figure S5. HMBC spectrum of **1** (CDCl<sub>3</sub>).

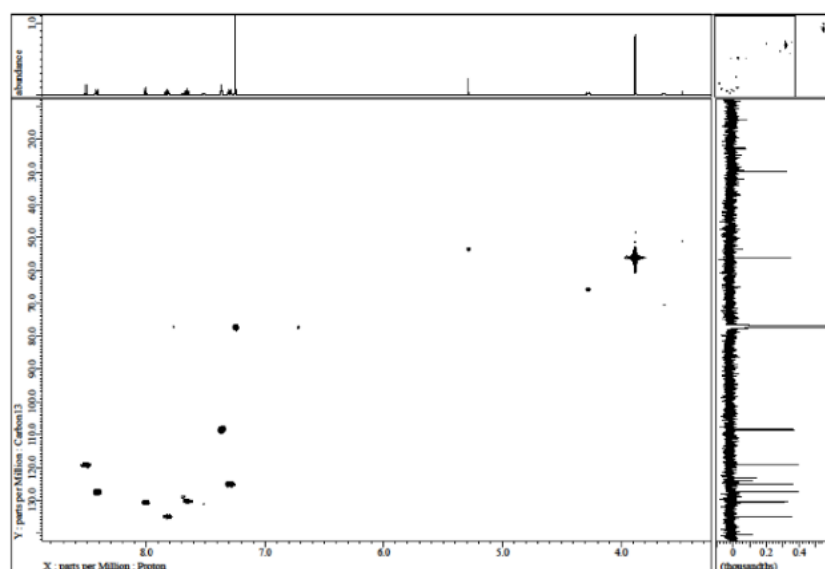

Figure S6. HMQC spectrum of **1** (CDCl<sub>3</sub>).

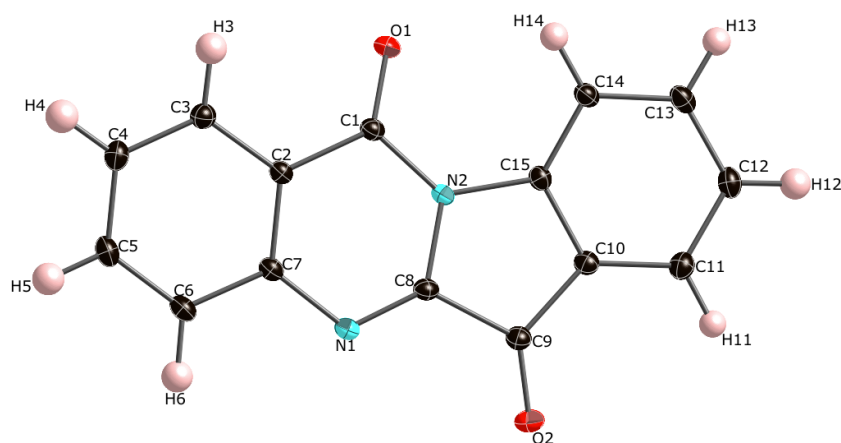

Figure S7. ORTEP drawings of **2** with ellipsoids at the 50% probability level.

**Table S1.** Crystallographic table of **2**.

|                                                            |                                                                              |
|------------------------------------------------------------|------------------------------------------------------------------------------|
| Empirical formula                                          | C <sub>15</sub> H <sub>8</sub> N <sub>2</sub> O <sub>2</sub>                 |
| Formula weight                                             | 248.23                                                                       |
| Temperature/K                                              | 173.15                                                                       |
| Crystal system                                             | monoclinic                                                                   |
| Space group                                                | <i>P</i> 2 <sub>1</sub> / <i>n</i>                                           |
| <i>a</i> /Å                                                | 7.3022 (2)                                                                   |
| <i>b</i> /Å                                                | 7.5655 (2)                                                                   |
| <i>c</i> /Å                                                | 19.4313 (5)                                                                  |
| $\alpha$ /°                                                | 90                                                                           |
| $\beta$ /°                                                 | 91.160 (2)                                                                   |
| $\gamma$ /°                                                | 90                                                                           |
| Volume/Å <sup>3</sup>                                      | 1073.26 (5)                                                                  |
| <i>Z</i>                                                   | 4                                                                            |
| $\rho_{\text{calc}}$ /g/cm <sup>3</sup>                    | 1.536                                                                        |
| $\mu$ /mm <sup>-1</sup>                                    | 0.105                                                                        |
| <i>F</i> (000)                                             | 512.0                                                                        |
| Crystal size/mm <sup>3</sup>                               | 0.34 × 0.15 × 0.1                                                            |
| Radiation                                                  | Mo <i>K</i> $\alpha$ ( $\lambda$ = 0.71073)                                  |
| Reflections collected                                      | 21807                                                                        |
| Independent reflections                                    | 2908 [ <i>R</i> <sub>int</sub> = 0.0283, <i>R</i> <sub>sigma</sub> = 0.0199] |
| Data/restraints/parameters                                 | 2908/0/204                                                                   |
| Goodness-of-fit on <i>F</i> <sup>2</sup>                   | 1.063                                                                        |
| Final <i>R</i> indexes [ <i>I</i> > $\sigma$ ( <i>I</i> )] | <i>R</i> <sub>1</sub> = 0.0464, <i>wR</i> <sub>2</sub> = 0.1154              |
| Final <i>R</i> indexes [all data]                          | <i>R</i> <sub>1</sub> = 0.0551, <i>wR</i> <sub>2</sub> = 0.1196              |
| Largest diff. peak/hole / e Å <sup>-3</sup>                | 0.45/-0.21                                                                   |

A suitable crystal was selected and on a Rigaku VariMax Saturn CCD (1.2 kW Mo rotating anode) at 173 K. The structure was solved with the SHELXT and refined with the SHELXL refinement package using Least Squares minimization<sup>48,49</sup>. The structure analyzed was essentially the same with the paper previously reported<sup>50</sup>.

48. Sheldrick, G. M. *SHELXT* - Integrated space-group and crystal-structure determination. *Acta Crystallographica Section A* **2015**, 71, 3-8, doi:10.1107/S2053273314026370.

- 
49. Sheldrick, G. M. Crystal structure refinement with *SHELXL*. *Acta Crystallographica Section C* **2015**, 71, 3-8, doi:10.1107/S2053229614024218.
50. Fedeli, W.; Mazza, F. J. Crystal structure of tryptanthrin (indolo[2,1-*b*]quinazoline-6,12-dione). *Journal of the Chemical Society, Perkin Transactions 2* **1974**, 13, 1621-1623, doi:10.1039/P29740001621.
